# Supplementary material for: Central-transition double-quantum sideband NMR spectroscopy of half-integer quadrupolar nuclei: estimating internuclear distances and probing clusters within multi-spin networks
Source: Royal Society of Chemistry journal article supplement (doi:10.1039/c4cp00029c), 2014-01-01
Supplement: c4cp00029c1.pdf [file c4cp00029c1.pdf]

Electronic Supplementary Information:  
Central-Transition Double-Quantum Sideband NMR Spectroscopy of  
Half-Integer Quadrupolar Nuclei: Estimating Internuclear Distances  
and Probing Clusters within Multi-Spin Networks

Andreas Brinkmann<sup>1\*</sup>, and Mattias Edén<sup>2</sup>

<sup>1</sup>*Measurement Science and Standards, National Research Council Canada,  
1200 Montreal Road, M-40, Ottawa, Ontario K1A 0R6, Canada.*

<sup>2</sup>*Physical Chemistry Division, Department of Materials and Environmental Chemistry,  
Arrhenius Laboratory, Stockholm University, 106 91 Stockholm, Sweden.*

\*E-mail: [Andreas.Brinkmann@nrc-cnrc.gc.ca](mailto:Andreas.Brinkmann@nrc-cnrc.gc.ca)

## S1 <sup>11</sup>B Spin Systems in bis(catecholato)diboron

Table S1 lists the probabilities of finding a particular pattern of occupancy by the <sup>11</sup>B isotope (80.1 % natural abundance) in the 4 boron site system shown in Fig. 2b.

| Sites Solely Occupied by <sup>11</sup> B | Probability |
|------------------------------------------|-------------|
| (1, 2, 3, 4)                             | 41.2 %      |
| (1, 2, 3) or (1, 2, 4)                   | 20.5 %      |
| (1, 3, 4) or (2, 3, 4)                   | 20.5 %      |
| (1, 3) or (2, 4)                         | 5.1 %       |
| (1, 4) or (2, 3)                         | 5.1 %       |
| (1, 2)                                   | 2.5 %       |

Table S1: <sup>11</sup>B occupancy probabilities in the 4 boron system shown in Fig. 2b.

## S2 Dipolar Coupling Multiplicities

Table S2 collects the internuclear distances and dipolar couplings for the samples used in this study, bis(catecholato)diboron ( $\text{C}_{12}\text{H}_8\text{B}_2\text{O}_4$ ),  $\text{Na}_2\text{SO}_4$  and  $\alpha\text{-Al}_2\text{O}_3$ . As each sample solely features one crystallographically unique B, Al or Na site, respectively, the indices  $j$  and  $k$  are given by  $j = k = 1$  in each case and thus dropped for clarity, i. e.,  $r = r_{11}$ ,  $b = b_{11}$ ,  $\Omega^{\text{DD}} = \Omega_{11}^{\text{DD}}$ ,  $\beta^{\text{DD}} = \beta_{11}^{\text{DD}}$ , and  $\gamma^{\text{DD}} = \gamma_{11}^{\text{DD}}$ . The listed internuclear distances  $r$  and dipolar coupling constants  $b$  correspond to  $^{11}\text{B}$ – $^{11}\text{B}$  pairs for bis(catecholato)diboron, to  $^{23}\text{Na}$ – $^{23}\text{Na}$  pairs for  $\text{Na}_2\text{SO}_4$ , and to  $^{27}\text{Al}$ – $^{27}\text{Al}$  pairs for  $\alpha\text{-Al}_2\text{O}_3$ . In all cases the multiplicity  $M$  and number of dipolar interactions that result in unique NMR responses  $N$  (see section 2.2.2) are given together with the Euler angles  $\Omega^{\text{DD}} = \{0, \beta^{\text{DD}}, \gamma^{\text{DD}}\}$ .

| Sample                                        | $r$<br>[pm]                    | $-b/2\pi$<br>[Hz] | $M$ | $N$ | $\{\beta^{\text{DD}}, \gamma^{\text{DD}}\}$<br>[°]                            |
|-----------------------------------------------|--------------------------------|-------------------|-----|-----|-------------------------------------------------------------------------------|
| $\text{C}_{12}\text{H}_8\text{B}_2\text{O}_4$ | 168                            | 2619              | 2   | 1   | {53.6, 42.5}                                                                  |
|                                               | 382                            | 222               | 2   | 1   | {85.7, 166.1}                                                                 |
|                                               | 475                            | 116               | 4   | 1   | {98.6, -180.0}                                                                |
|                                               | 601                            | 57.0              | 1   | 1   | {73.5, 9.1}                                                                   |
|                                               | 621                            | 51.7              | 2   | 2   | {167.4, 42.5}, {12.6, 137.5}                                                  |
| $\text{Na}_2\text{SO}_4$                      | 321                            | 253               | 4   | 2   | {122.2, 117.7}, {23.2, -4.7}                                                  |
|                                               | 360                            | 181               | 4   | 4   | {98.7, -163.5}, {98.7, -16.5}, {60.2, -133.4}, {143.1, 6.5}                   |
|                                               | 361                            | 180               | 2   | 1   | {118.3, -90}                                                                  |
|                                               | 420                            | 113.5             | 8   | 4   | {73.9, 32.4}, {106.1, 57.9}, {73.9, 147.6}, {33.7, 157.1}                     |
|                                               | 508                            | 64.2              | 4   | 4   | {69.4, 44.2}, {96.2, 64.9}, {69.4, 135.8}, {35.8, 136.2}                      |
|                                               | 549                            | 50.8              | 4   | 4   | {121.6, 177}, {71, -25.9}, {41.4, -104}, {161.5, 59.6}                        |
|                                               | 572                            | 44.9              | 8   | 2   | {90, 102.8}, {44.5, -112.4}                                                   |
|                                               | 587                            | 41.6              | 4   | 1   | {142.6, 135.2}                                                                |
|                                               | 590                            | 40.9              | 8   | 4   | {53.7, 11}, {101.4, 143.8}, {126.3, 79.3}, {170.8, 21.6}                      |
|                                               | $\alpha\text{-Al}_2\text{O}_3$ | 266               | 436 | 2   | 1                                                                             |
| 279                                           |                                | 375               | 6   | 3   | {79.9, 60}, {79.9, -60}, {100.1, 0}                                           |
| 322                                           |                                | 245               | 6   | 3   | {58.6, 60}, {58.6, -60}, {121.4, 0.}                                          |
| 350                                           |                                | 191               | 12  | 3   | {128.2, 60}, {128.2, -60}, {51.8, 0}                                          |
| 384                                           |                                | 144               | 2   | 1   | {0, 0}                                                                        |
| 476                                           |                                | 75.7              | 15  | 3   | {90, 90}, {90, 30}, {90, -30}                                                 |
| 513                                           |                                | 60.5              | 12  | 3   | {32.4, 60}, {32.4, -60}, {32.4, 180.}                                         |
| 545                                           |                                | 50.4              | 18  | 6   | {60.8, 90}, {60.8, -90}, {60.8, 30}, {60.8, -30}<br>{60.8, 150}, {60.8, -150} |
| 552                                           |                                | 48.6              | 3   | 1   | {84.9, 0}, {84.9, 120}, {84.9, -120}                                          |
| 555                                           |                                | 47.8              | 6   | 3   | {29.7, 0}, {29.7, 120}, {29.7, -120}                                          |
| 575                                           |                                | 43.1              | 9   | 3   | {73, 0}, {73, 120}, {73, -120}                                                |
| 591                                           |                                | 39.6              | 9   | 3   | {111.5, 0}, {111.5, 120}, {111.5, -120}                                       |

Table S2: Internuclear distances and dipolar couplings for the samples used in this study, bis(catecholato)diboron ( $\text{C}_{12}\text{H}_8\text{B}_2\text{O}_4$ ),  $\text{Na}_2\text{SO}_4$  and  $\alpha\text{-Al}_2\text{O}_3$ .
